# Supplementary material for: Influence of short-term synoptic events and snow depth on DMS, DMSP, and DMSO dynamics in Antarctic spring sea ice
Source: Oxford University Press journal article supplement (doi:10.12952/journal.elementa.000135), 2016-01-01
Supplement: 135_tables1_092116.xlsx [file 135_tables1_092116.xlsx]

## Sheet: Sheet1
		Brussels
		Station 2		Station 3		Station 4		Station 5
Depth (cm)	Algal group	µg C L-1	%	µg C L-1	%	µgC L-1	%	µgC L-1	%
0-10	sDIA	56.8	11.2			102.5	15	45.6	7.7
	lDIA	55.6	11			285	41.6	25.3	4.3
	nFLA	41.3	8.1			95.3	13.9	196.2	33.3
	dFLA	353.1	69.7			201.6	29.5	322	54.7
	Total	506.8	100			684.4	100	589.1	100
10-20	sDIA			8.1	2.8	8	2.6	45.7	11.9
	lDIA			9	3.1	10.5	3.3	25	6.5
	nFLA			89.2	30.3	95.6	30.3	113.1	29.5
	dFLA			187.3	63.8	201	63.8	200.1	52.1
	Total			293.6	100	315.1	100	383.9	100
60-70	sDIA			5	0.7
	lDIA			3.5	0.5
	nFLA			118.5	17.2
	dFLA			560	81.5
	Total			687	100
		Liège
		Station 1		Station 3		Station 4		Station 5
Depth (cm)	Algal group	µg C L-1	%	µg C L-1	%	µgC L-1	%	µgC L-1	%
10-20	sDIA	24.1	3	17.5	4.2	19.6	6	24.6	2.8
	lDIA	12.4	1.5	15.6	3.7	13.2	4.1	8.1	0.9
	nFLA	201.7	25.1	199.5	47.7	145	44.9	403.1	45.3
	dFLA	566.1	70.4	185.4	44.4	145.4	45	453	51
	Total	804.3	100	418	100	323.2	100	888.8	100
52-60	sDIA	26.8	3.2	28.7	9.8			36.7	7.1
	lDIA	25.4	3	35.6	12.1			9.1	1.8
	nFLA	142.3	16.7	123.4	42			162.4	31.6
	dFLA	654.9	77.1	106.3	36.1			305.8	59.5
	Total	849.4	100	294	100			514	100
86-96	sDIA			36.4	12.6
	lDIA			17.7	6.1
	nFLA			90.2	31.1
	dFLA			145.7	50.2
	Total			290	100
